# Supplementary material
Source: bioRxiv or medRxiv preprint supplement (https://www.biorxiv.org/highwire/filestream/9727/field_highwire_adjunct_files/0/025981-1.pdf)
Supplement: Supplementary file [file 025981-1.pdf]

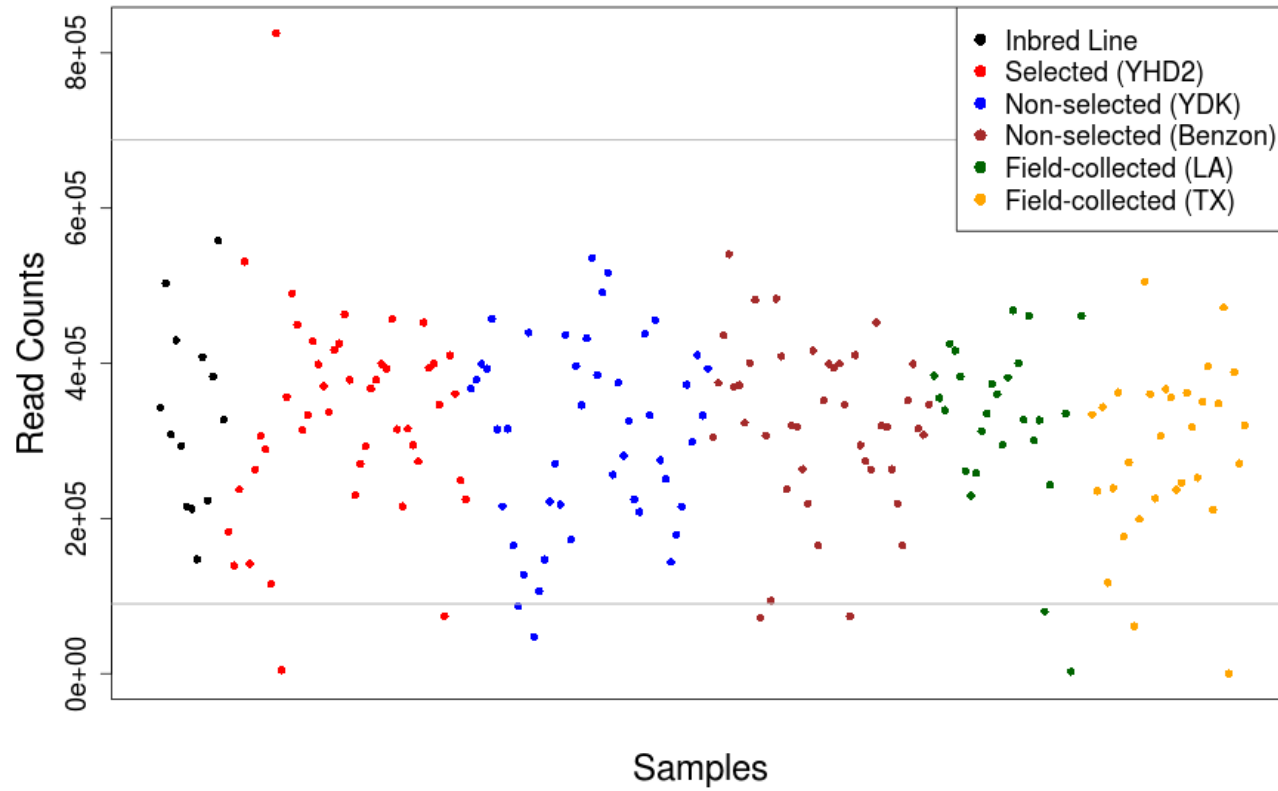

**Supplementary Figure 1** - Read counts per individual, color-coded by population. Individuals with read counts above ( $3\times$ ) and below ( $1/3\times$ ) the grey lines were excluded from downstream analyses.

**Supplementary Table 1** - Multiple sets of consensus loci used to calculate population genetics parameters. Consensus sets of loci containing 125, 378, and 583 loci are subsets of the largest set containing 1231 loci. The mean and maximum numbers of alleles per marker reported represent summary statistics for the entire multi-population dataset. The abbreviations Bt-sel and NS stand for Bt-selected and non-selected, respectively.

| Number of Loci | Missing Genotypes (%) | Mean Number of Alleles per Marker | Max Number of Alleles per Marker | Fixed Loci (% of Total Examined) |               |          |           |            |            |
|----------------|-----------------------|-----------------------------------|----------------------------------|----------------------------------|---------------|----------|-----------|------------|------------|
|                |                       |                                   |                                  | Inbred line                      | Bt-Sel (YHD2) | NS (YDK) | NS (BENZ) | Field (LA) | Field (TX) |
| 125            | 11.2                  | 34                                | 86                               | 86.4                             | 7.2           | 5.6      | 8.0       | 2.4        | 0          |
| 378            | 18.6                  | 32                                | 94                               | 85.7                             | 5.3           | 5.6      | 7.9       | 1.1        | 0.3        |
| 583            | 19.3                  | 32                                | 94                               | 84.2                             | 6.9           | 6.2      | 9.3       | 0.9        | 0.2        |
| 1231           | 29.5                  | 29                                | 94                               | 81.3                             | 7.3           | 7.5      | 10.9      | 1.4        | 0.9        |

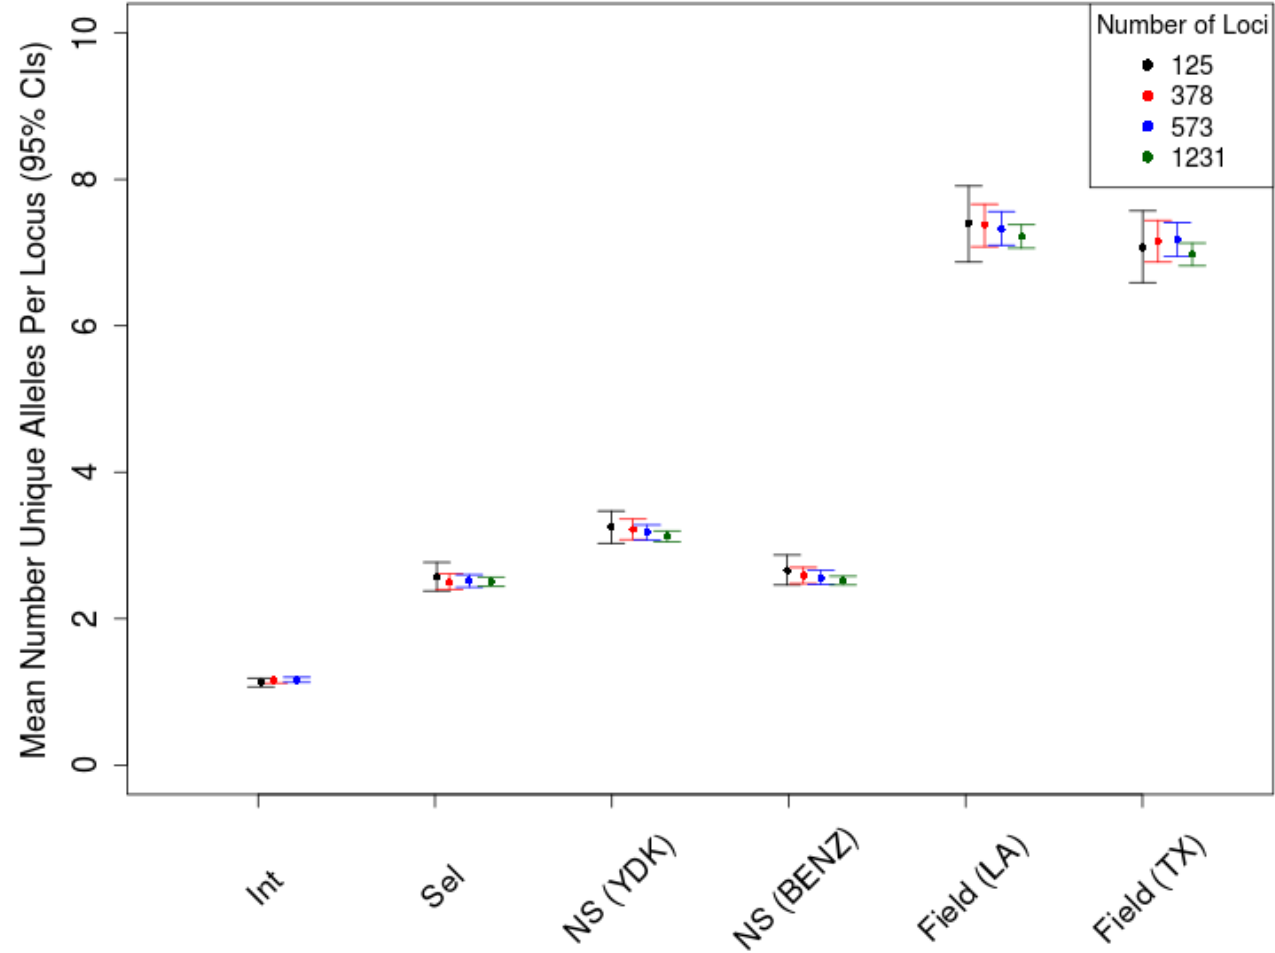

**Supplementary Figure 2** – Plot of genome-wide average number of unique alleles ( $\pm$  95% CIs) across populations. Each dataset, represented by a unique color, contained different numbers of consensus loci. Haplotype sampling was set to either a depth of 6 (data not shown) or 12. Mean numbers of unique loci were not different across datasets within a population, as indicated by overlapping 95% confidence intervals.

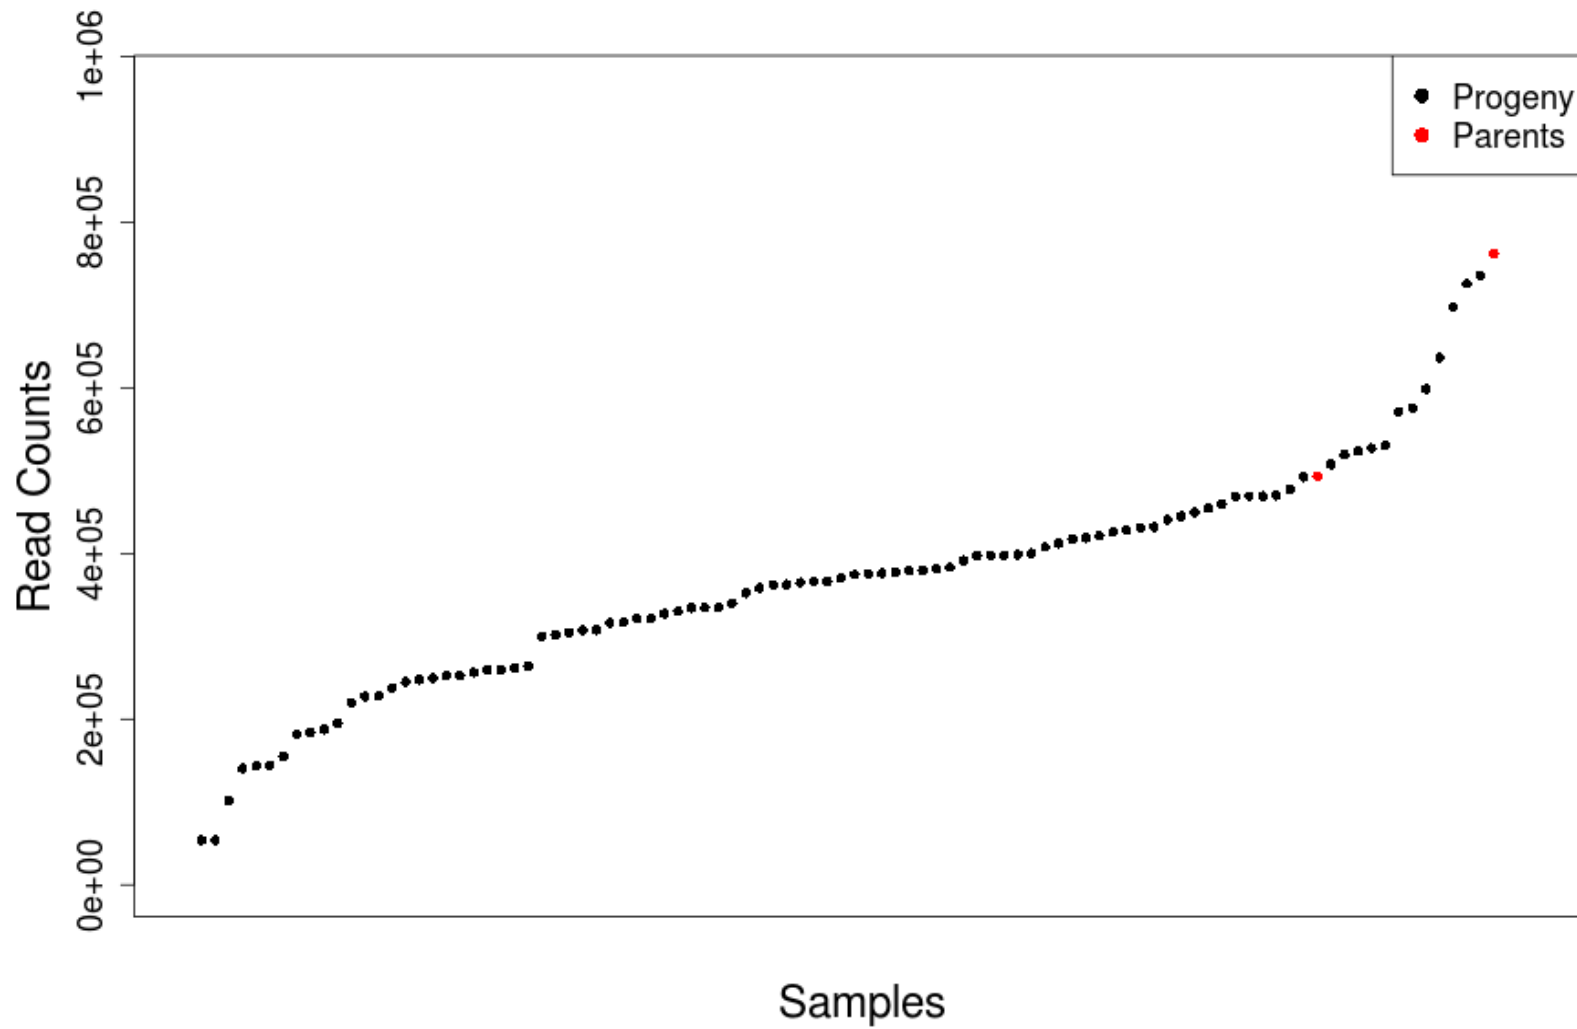

**Supplementary Figure 3** -Number of reads per individual for the mapping family. Read counts for parents and progeny are in red and black, respectively.

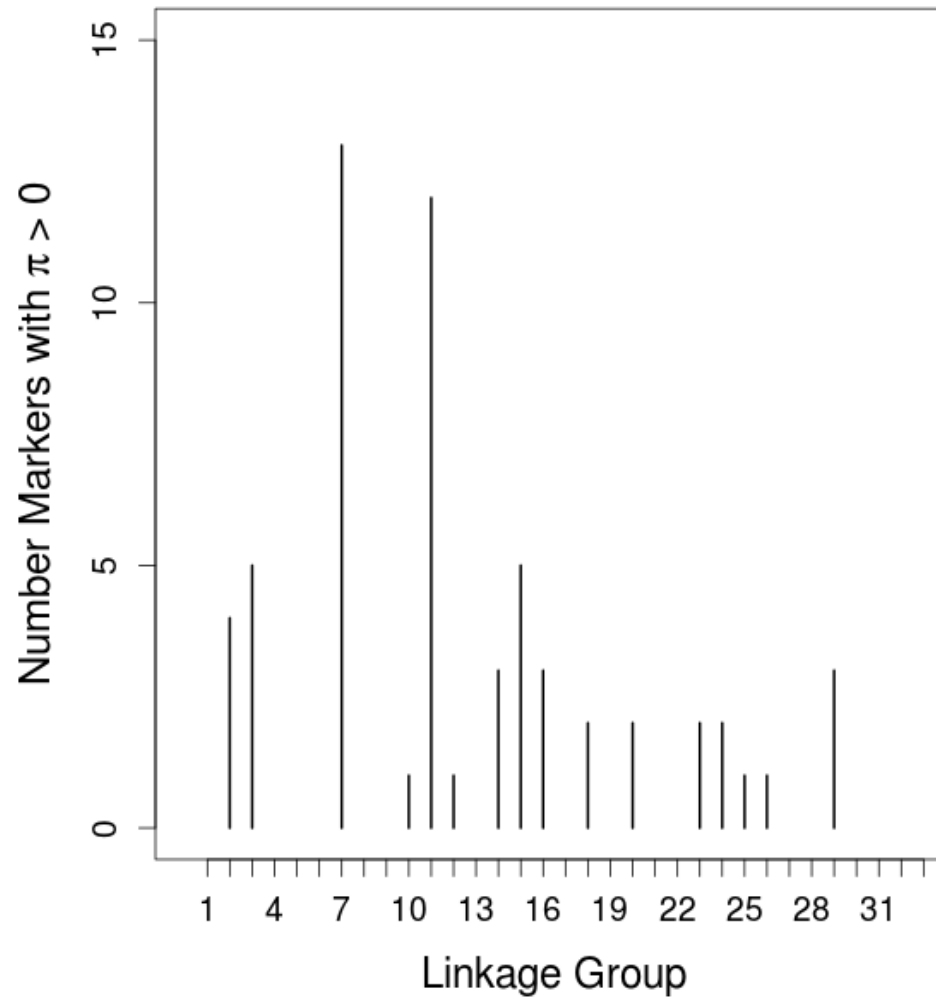

**Supplementary Figure 4** - Number of markers per linkage group with a nucleotide diversity value ( $\pi$ ) of greater than zero in the inbred line. Linkage groups retaining significantly more polymorphism than expected are: 2, 3, 7, 11, 14, 15, 16, and 29.

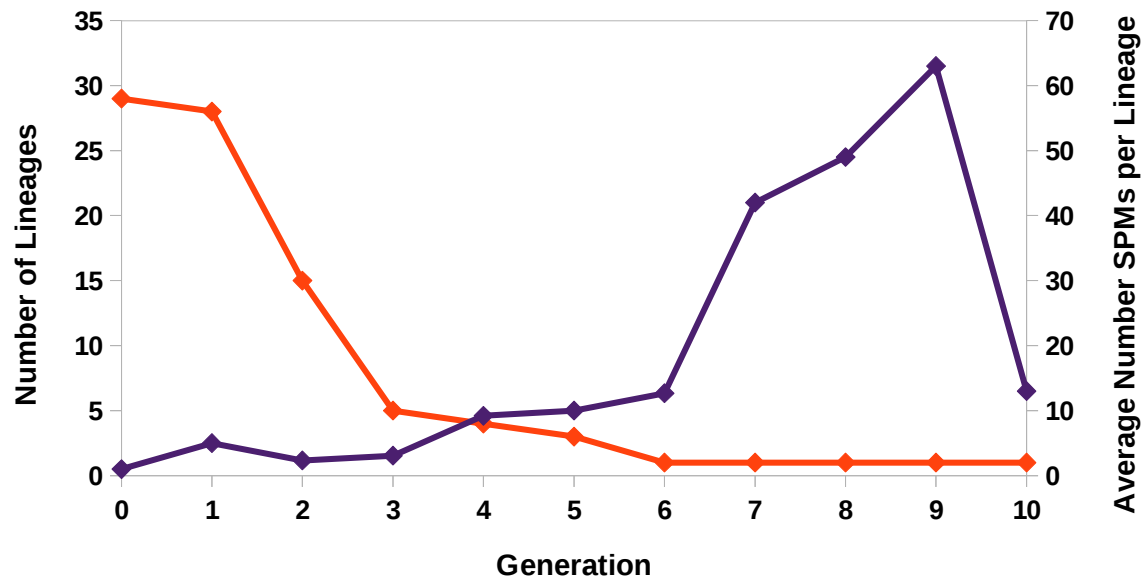

**Supplementary Figure 5** – Number of lineages that remained following each generation of full-sibling mating (orange) during production of the inbred line. The blue line represents the average number of SPMs set up per generation across remaining lineages. Only a single lineage existed following generation 5, for which the blue line represents the number of SPMs set up for the existing line.

**Supplementary Table 2** – Replicated G-test of Independence to used to examine whether clustering of polymorphic markers among the total mapped markers (N = 441) in the inbred line was more heterogeneous than could be expected due to chance. An asterisk (\*) indicates a statistically significant p-value relative to a bonferroni adjusted alpha value of 0.002.

| <b>Linkage Group</b>         | <b>Polymorphic Markers</b> | <b>Fixed Markers</b> | <b>Percentage Polymorphic</b> | <b>G-value</b> | <b>df</b> | <b>p-value</b> |
|------------------------------|----------------------------|----------------------|-------------------------------|----------------|-----------|----------------|
| 1                            | 0                          | 16                   | 0                             | 0.48           | 1         | 0.487          |
| 2                            | 4                          | 12                   | 0.25                          | 15.97          | 1         | < 0.001*       |
| 3                            | 5                          | 18                   | 0.27                          | 18.46          | 1         | < 0.001*       |
| 4                            | 0                          | 5                    | 0                             | 0.15           | 1         | 0.697          |
| 5                            | 0                          | 25                   | 0                             | 0.76           | 1         | 0.385          |
| 6                            | 0                          | 27                   | 0                             | 0.82           | 1         | 0.366          |
| 7                            | 13                         | 37                   | 0.35                          | 53.01          | 1         | < 0.001*       |
| 8                            | 0                          | 15                   | 0                             | 0.45           | 1         | 0.501          |
| 10                           | 1                          | 18                   | 0.06                          | 1.11           | 1         | 0.292          |
| 11                           | 10                         | 29                   | 0.34                          | 40.47          | 1         | < 0.001*       |
| 12                           | 1                          | 13                   | 0.08                          | 1.59           | 1         | 0.21           |
| 13                           | 0                          | 24                   | 0                             | 0.73           | 1         | 0.394          |
| 14                           | 3                          | 15                   | 0.20                          | 9.43           | 1         | 0.002*         |
| 15                           | 4                          | 27                   | 0.15                          | 10.57          | 1         | 0.001*         |
| 16                           | 3                          | 13                   | 0.23                          | 10.15          | 1         | 0.001*         |
| 17                           | 0                          | 7                    | 0                             | 0.21           | 1         | 0.646          |
| 18                           | 2                          | 7                    | 0.29                          | 7.48           | 1         | 0.006          |
| 20                           | 2                          | 20                   | 0.10                          | 4.00           | 1         | 0.046          |
| 21                           | 0                          | 14                   | 0                             | 0.42           | 1         | 0.515          |
| 22                           | 0                          | 14                   | 0                             | 0.42           | 1         | 0.515          |
| 23                           | 2                          | 13                   | 0.15                          | 5.41           | 1         | 0.020          |
| 25                           | 1                          | 32                   | 0.03                          | 0.40           | 1         | 0.525          |
| 29                           | 3                          | 8                    | 0.38                          | 12.55          | 1         | < 0.001*       |
| 30                           | 0                          | 5                    | 0                             | 0.15           | 1         | 0.697          |
| <b>Total G-value</b>         |                            |                      |                               | 194.81         | 24        | < 0.001        |
| <b>Pooled G-value</b>        |                            |                      |                               | 170.94         | 1         | < 0.001        |
| <b>Heterogeneity G-value</b> |                            |                      |                               | 23.87          | 23        | 0.41           |

**Supplementary Table 3** – HPSF-purified oligonucleotide sequences (Eurofins MWG Operon LLC, Huntsville, AL, USA) used to create uniquely barcoded double-stranded adapters with an EcoRI overhang site. Two oligonucleotides (p1.1 and p1.2) corresponding to the same barcode were annealed according to Poland *et al.* (2012) to generate each adapter.

| Oligonucleotide Name | Barcode  | Nucleotide Sequence 5'-3'               |
|----------------------|----------|-----------------------------------------|
| p1.1_EcoRI_CGCGGT    | CGCGGT   | ACACTCTTCCCTACACGACGCTCTCCGATCTCGCGGT   |
| p1.1_EcoRI_CTATTA    | CTATTA   | ACACTCTTCCCTACACGACGCTCTCCGATCTCTATTA   |
| p1.1_EcoRI_GCCAGT    | GCCAGT   | ACACTCTTCCCTACACGACGCTCTCCGATCTGCCAGT   |
| p1.1_EcoRI_GGAAGA    | GGAAGA   | ACACTCTTCCCTACACGACGCTCTCCGATCTGGAAGA   |
| p1.1_EcoRI_GTACTT    | GTACTT   | ACACTCTTCCCTACACGACGCTCTCCGATCTGTACTT   |
| p1.1_EcoRI_GTTGAA    | GTTGAA   | ACACTCTTCCCTACACGACGCTCTCCGATCTGTTGAA   |
| p1.1_EcoRI_TAACGA    | TAACGA   | ACACTCTTCCCTACACGACGCTCTCCGATCTTAACGA   |
| p1.1_EcoRI_TGGCTA    | TGGCTA   | ACACTCTTCCCTACACGACGCTCTCCGATCTTGGCTA   |
| p1.1_EcoRI_TATTTT    | TATTTT   | ACACTCTTCCCTACACGACGCTCTCCGATCTTATTTT   |
| p1.1_EcoRI_CTTGCTT   | CTTGCTT  | ACACTCTTCCCTACACGACGCTCTCCGATCTCTTGCTT  |
| p1.1_EcoRI_ATGAAAC   | ATGAAAC  | ACACTCTTCCCTACACGACGCTCTCCGATCTATGAAAC  |
| p1.1_EcoRI_AAAAGTT   | AAAAGTT  | ACACTCTTCCCTACACGACGCTCTCCGATCTAAAAGTT  |
| p1.1_EcoRI_GAATTCA   | GAATTCA  | ACACTCTTCCCTACACGACGCTCTCCGATCTGAATTCA  |
| p1.1_EcoRI_GAACCTC   | GAACCTC  | ACACTCTTCCCTACACGACGCTCTCCGATCTGAACCTC  |
| p1.1_EcoRI_GTCGATT   | GTCGATT  | ACACTCTTCCCTACACGACGCTCTCCGATCTGTCGATT  |
| p1.1_EcoRI_AACGCCT   | AACGCCT  | ACACTCTTCCCTACACGACGCTCTCCGATCTAACGCCT  |
| p1.1_EcoRI_AATATGC   | AATATGC  | ACACTCTTCCCTACACGACGCTCTCCGATCTAATATGC  |
| p1.1_EcoRI_ACGTGTT   | ACGTGTT  | ACACTCTTCCCTACACGACGCTCTCCGATCTACGTGTT  |
| p1.1_EcoRI_ATTAATT   | ATTAATT  | ACACTCTTCCCTACACGACGCTCTCCGATCTATTAATT  |
| p1.1_EcoRI_ATTGGAT   | ATTGGAT  | ACACTCTTCCCTACACGACGCTCTCCGATCTATTGGAT  |
| p1.1_EcoRI_CATAAGT   | CATAAGT  | ACACTCTTCCCTACACGACGCTCTCCGATCTCATAAGT  |
| p1.1_EcoRI_CGCTGAT   | CGCTGAT  | ACACTCTTCCCTACACGACGCTCTCCGATCTCGCTGAT  |
| p1.1_EcoRI_CGGTAGA   | CGGTAGA  | ACACTCTTCCCTACACGACGCTCTCCGATCTCGGTAGA  |
| p1.1_EcoRI_CTACGGA   | CTACGGA  | ACACTCTTCCCTACACGACGCTCTCCGATCTCTACGGA  |
| p1.1_EcoRI_GCGGAAT   | GCGGAAT  | ACACTCTTCCCTACACGACGCTCTCCGATCTGCGGAAT  |
| p1.1_EcoRI_TAGCGGA   | TAGCGGA  | ACACTCTTCCCTACACGACGCTCTCCGATCTTAGCGGA  |
| p1.1_EcoRI_TCGAAGA   | TCGAAGA  | ACACTCTTCCCTACACGACGCTCTCCGATCTTCGAAGA  |
| p1.1_EcoRI_TCTGTGA   | TCTGTGA  | ACACTCTTCCCTACACGACGCTCTCCGATCTTCTGTGA  |
| p1.1_EcoRI_TGCTGGA   | TGCTGGA  | ACACTCTTCCCTACACGACGCTCTCCGATCTTGCTGGA  |
| p1.1_EcoRI_ACGACTAC  | ACGACTAC | ACACTCTTCCCTACACGACGCTCTCCGATCTACGACTAC |
| p1.1_EcoRI_TAGCATGC  | TAGCATGC | ACACTCTTCCCTACACGACGCTCTCCGATCTTAGCATGC |
| p1.1_EcoRI_TAGGCCAT  | TAGGCCAT | ACACTCTTCCCTACACGACGCTCTCCGATCTTAGGCCAT |
| p1.1_EcoRI_TGCAAGGA  | TGCAAGGA | ACACTCTTCCCTACACGACGCTCTCCGATCTTGCAAGGA |
| p1.1_EcoRI_TGGTACGT  | TGGTACGT | ACACTCTTCCCTACACGACGCTCTCCGATCTTGGTACGT |
| p1.1_EcoRI_TCTCAGTC  | TCTCAGTC | ACACTCTTCCCTACACGACGCTCTCCGATCTTCTCAGTC |
| p1.1_EcoRI_CCGGATAT  | CCGGATAT | ACACTCTTCCCTACACGACGCTCTCCGATCTCCGGATAT |
| p1.1_EcoRI_CGCCTTAT  | CGCCTTAT | ACACTCTTCCCTACACGACGCTCTCCGATCTCGCCTTAT |
| p1.1_EcoRI_AACCGAGA  | AACCGAGA | ACACTCTTCCCTACACGACGCTCTCCGATCTAACCGAGA |
| p1.1_EcoRI_ACAGGGAA  | ACAGGGAA | ACACTCTTCCCTACACGACGCTCTCCGATCTACAGGGAA |
| p1.1_EcoRI_ACGTGGTA  | ACGTGGTA | ACACTCTTCCCTACACGACGCTCTCCGATCTACGTGGTA |
| p1.1_EcoRI_CCATGGGT  | CCATGGGT | ACACTCTTCCCTACACGACGCTCTCCGATCTCCATGGGT |
| p1.1_EcoRI_CGCGGAGA  | CGCGGAGA | ACACTCTTCCCTACACGACGCTCTCCGATCTCGCGGAGA |
| p1.1_EcoRI_CGTGTGGT  | CGTGTGGT | ACACTCTTCCCTACACGACGCTCTCCGATCTCGTGTGGT |
| p1.1_EcoRI_GCTGTGGA  | GCTGTGGA | ACACTCTTCCCTACACGACGCTCTCCGATCTGCTGTGGA |
| p1.1_EcoRI_GGATTGGT  | GGATTGGT | ACACTCTTCCCTACACGACGCTCTCCGATCTGGATTGGT |
| p1.1_EcoRI_GTGAGGGT  | GTGAGGGT | ACACTCTTCCCTACACGACGCTCTCCGATCTGTGAGGGT |
| p1.1_EcoRI_TATCGGGA  | TATCGGGA | ACACTCTTCCCTACACGACGCTCTCCGATCTTATCGGGA |
| p1.1_EcoRI_TTCCTGGA  | TTCCTGGA | ACACTCTTCCCTACACGACGCTCTCCGATCTTTCCTGGA |



Supplementary Table 3 continued.

| Oligonucleotide Name | Barcode  | Nucleotide Sequence 5'-3'                            |
|----------------------|----------|------------------------------------------------------|
| p1.2_EcoRI_CGCGGT    | CGCGGT   | [Phos]AATTACCGCGAGATCGGAAGAGCGTCGTGTAGGGAAAGAGTGT    |
| p1.2_EcoRI_CTATTA    | CTATTA   | [Phos]AATTTAATAGAGATCGGAAGAGCGTCGTGTAGGGAAAGAGTGT    |
| p1.2_EcoRI_GCCAGT    | GCCAGT   | [Phos]AATTACTGGCAGATCGGAAGAGCGTCGTGTAGGGAAAGAGTGT    |
| p1.2_EcoRI_GGAAGA    | GGAAGA   | [Phos]AATTTCTTCCAGATCGGAAGAGCGTCGTGTAGGGAAAGAGTGT    |
| p1.2_EcoRI_GTACTT    | GTACTT   | [Phos]AATTAAGTACAGATCGGAAGAGCGTCGTGTAGGGAAAGAGTGT    |
| p1.2_EcoRI_GTTGAA    | GTTGAA   | [Phos]AATTTTCAACAGATCGGAAGAGCGTCGTGTAGGGAAAGAGTGT    |
| p1.2_EcoRI_TAACGA    | TAACGA   | [Phos]AATTTTCGTTAAGATCGGAAGAGCGTCGTGTAGGGAAAGAGTGT   |
| p1.2_EcoRI_TGGCTA    | TGGCTA   | [Phos]AATTTAGCCAAGATCGGAAGAGCGTCGTGTAGGGAAAGAGTGT    |
| p1.2_EcoRI_TATTTTT   | TATTTTT  | [Phos]AATTAATAAATAAGATCGGAAGAGCGTCGTGTAGGGAAAGAGTGT  |
| p1.2_EcoRI_CTTGCTT   | CTTGCTT  | [Phos]AATTAAGCAAGAGATCGGAAGAGCGTCGTGTAGGGAAAGAGTGT   |
| p1.2_EcoRI_ATGAAAC   | ATGAAAC  | [Phos]AATTGTTTCATAGATCGGAAGAGCGTCGTGTAGGGAAAGAGTGT   |
| p1.2_EcoRI_AAAAGTT   | AAAAGTT  | [Phos]AATTAACTTTTAGATCGGAAGAGCGTCGTGTAGGGAAAGAGTGT   |
| p1.2_EcoRI_GAATTCA   | GAATTCA  | [Phos]AATTTGAATTCAGATCGGAAGAGCGTCGTGTAGGGAAAGAGTGT   |
| p1.2_EcoRI_GAACCTC   | GAACCTC  | [Phos]AATTGAGGTTCCAGATCGGAAGAGCGTCGTGTAGGGAAAGAGTGT  |
| p1.2_EcoRI_GTCGATT   | GTCGATT  | [Phos]AATTAATCGACAGATCGGAAGAGCGTCGTGTAGGGAAAGAGTGT   |
| p1.2_EcoRI_AACGCCT   | AACGCCT  | [Phos]AATTAGGCGTTAGATCGGAAGAGCGTCGTGTAGGGAAAGAGTGT   |
| p1.2_EcoRI_AATATGC   | AATATGC  | [Phos]AATTGCATATTAGATCGGAAGAGCGTCGTGTAGGGAAAGAGTGT   |
| p1.2_EcoRI_ACGTGTT   | ACGTGTT  | [Phos]AATTAACACGTAGATCGGAAGAGCGTCGTGTAGGGAAAGAGTGT   |
| p1.2_EcoRI_ATTAATT   | ATTAATT  | [Phos]AATTAATTAATAGATCGGAAGAGCGTCGTGTAGGGAAAGAGTGT   |
| p1.2_EcoRI_ATTGGAT   | ATTGGAT  | [Phos]AATTATCCAATAGATCGGAAGAGCGTCGTGTAGGGAAAGAGTGT   |
| p1.2_EcoRI_CATAAGT   | CATAAGT  | [Phos]AATTACTTATGAGATCGGAAGAGCGTCGTGTAGGGAAAGAGTGT   |
| p1.2_EcoRI_CGCTGAT   | CGCTGAT  | [Phos]AATTAATCAGCGAGATCGGAAGAGCGTCGTGTAGGGAAAGAGTGT  |
| p1.2_EcoRI_CGGTAGA   | CGGTAGA  | [Phos]AATTTCTACCGAGATCGGAAGAGCGTCGTGTAGGGAAAGAGTGT   |
| p1.2_EcoRI_CTACGGA   | CTACGGA  | [Phos]AATTTCCGTAGAGATCGGAAGAGCGTCGTGTAGGGAAAGAGTGT   |
| p1.2_EcoRI_GCGGAAT   | GCGGAAT  | [Phos]AATTATTCCGCAGATCGGAAGAGCGTCGTGTAGGGAAAGAGTGT   |
| p1.2_EcoRI_TAGCGGA   | TAGCGGA  | [Phos]AATTTCCGCTAAGATCGGAAGAGCGTCGTGTAGGGAAAGAGTGT   |
| p1.2_EcoRI_TCGAAGA   | TCGAAGA  | [Phos]AATTTCTTCGAAGATCGGAAGAGCGTCGTGTAGGGAAAGAGTGT   |
| p1.2_EcoRI_TCTGTGA   | TCTGTGA  | [Phos]AATTTACAGAAGATCGGAAGAGCGTCGTGTAGGGAAAGAGTGT    |
| p1.2_EcoRI_TGCTGGA   | TGCTGGA  | [Phos]AATTTCCAGCAAGATCGGAAGAGCGTCGTGTAGGGAAAGAGTGT   |
| p1.2_EcoRI_ACGACTAC  | ACGACTAC | [Phos]AATTGTAGTCGTAGATCGGAAGAGCGTCGTGTAGGGAAAGAGTGT  |
| p1.2_EcoRI_TAGCATGC  | TAGCATGC | [Phos]AATTGCATGCTAAGATCGGAAGAGCGTCGTGTAGGGAAAGAGTGT  |
| p1.2_EcoRI_TAGGCCAT  | TAGGCCAT | [Phos]AATTATGGCCTAAGATCGGAAGAGCGTCGTGTAGGGAAAGAGTGT  |
| p1.2_EcoRI_TGCAAGGA  | TGCAAGGA | [Phos]AATTTCTTGAAGATCGGAAGAGCGTCGTGTAGGGAAAGAGTGT    |
| p1.2_EcoRI_TGGTACGT  | TGGTACGT | [Phos]AATTACGTACCAAGATCGGAAGAGCGTCGTGTAGGGAAAGAGTGT  |
| p1.2_EcoRI_TCTCAGTC  | TCTCAGTC | [Phos]AATTGACTGAGAAGATCGGAAGAGCGTCGTGTAGGGAAAGAGTGT  |
| p1.2_EcoRI_CCGGATAT  | CCGGATAT | [Phos]AATTATATCCGGAGATCGGAAGAGCGTCGTGTAGGGAAAGAGTGT  |
| p1.2_EcoRI_CGCCTTAT  | CGCCTTAT | [Phos]AATTATAAGGCCGAGATCGGAAGAGCGTCGTGTAGGGAAAGAGTGT |
| p1.2_EcoRI_AACCGAGA  | AACCGAGA | [Phos]AATTTCTCGGTTAGATCGGAAGAGCGTCGTGTAGGGAAAGAGTGT  |
| p1.2_EcoRI_ACAGGGAA  | ACAGGGAA | [Phos]AATTTTCCCTGTAGATCGGAAGAGCGTCGTGTAGGGAAAGAGTGT  |
| p1.2_EcoRI_ACGTGGTA  | ACGTGGTA | [Phos]AATTTACCACGTAGATCGGAAGAGCGTCGTGTAGGGAAAGAGTGT  |
| p1.2_EcoRI_CCATGGGT  | CCATGGGT | [Phos]AATTACCCATGGAGATCGGAAGAGCGTCGTGTAGGGAAAGAGTGT  |
| p1.2_EcoRI_CGCGGAGA  | CGCGGAGA | [Phos]AATTTCTCCGCGAGATCGGAAGAGCGTCGTGTAGGGAAAGAGTGT  |
| p1.2_EcoRI_CGTGTGGT  | CGTGTGGT | [Phos]AATTACCACACGAGATCGGAAGAGCGTCGTGTAGGGAAAGAGTGT  |
| p1.2_EcoRI_GCTGTGGA  | GCTGTGGA | [Phos]AATTTCCACAGCAGATCGGAAGAGCGTCGTGTAGGGAAAGAGTGT  |
| p1.2_EcoRI_GGATTGGT  | GGATTGGT | [Phos]AATTACCAATCCAGATCGGAAGAGCGTCGTGTAGGGAAAGAGTGT  |
| p1.2_EcoRI_GTGAGGGT  | GTGAGGGT | [Phos]AATTACCCTCACAGATCGGAAGAGCGTCGTGTAGGGAAAGAGTGT  |
| p1.2_EcoRI_TATCGGGA  | TATCGGGA | [Phos]AATTTCCCGATAAGATCGGAAGAGCGTCGTGTAGGGAAAGAGTGT  |
| p1.2_EcoRI_TTCCTGGA  | TTCCTGGA | [Phos]AATTTCCAGGAAAGATCGGAAGAGCGTCGTGTAGGGAAAGAGTGT  |

**Supplementary Table 4** - HPSF-purified oligonucleotide sequences (Eurofins MWG Operon LLC, Huntsville, AL, USA) used to create MSP overhang, and primers used to add Illumina indices to each gDNA library.

| Oligo Name | Oligo Type             | Index  | Oligonucleotide Sequence 5'-3'                             |
|------------|------------------------|--------|------------------------------------------------------------|
| MSPI_P2.1  | Adapter – MSP overhang | -      | GTGACTGGAGTTCAGACGTGTGCTCTTCCGATCT                         |
| MSPI_P2.2  | Adapter – MSP overhang | -      | [Phos]CGAGATCGGAAGAGCGAGAACAA                              |
| ddRAD_PCR1 | Primer – Forward       | -      | AATGATACGGCGACCACCGAGATCTACACTCTTCCCTACACGACG              |
| PCR2_Idx1  | Primer – Reverse       | ATCACG | CAAGCAGAAGACGGCATAACGAGATCGTGATGTGACTGGAGTTCA<br>GACGTGTGC |
| PCR2_Idx2  | Primer – Reverse       | CGATGT | CAAGCAGAAGACGGCATAACGAGATACATCGGTGACTGGAGTTCA<br>GACGTGTGC |
| PCR2_Idx3  | Primer - Reverse       | TTAGGC | CAAGCAGAAGACGGCATAACGAGATGCCTAAGTGACTGGAGTTCA<br>GACGTGTGC |
| PCR2_Idx4  | Primer - Reverse       | TGACCA | CAAGCAGAAGACGGCATAACGAGATTGGTCAGTGACTGGAGTTCA<br>GACGTGTGC |
| PCR2_Idx6  | Primer – Reverse       | GCCAAT | CAAGCAGAAGACGGCATAACGAGATATTGGCGTGACTGGAGTTCA<br>GACGTGTGC |
| PCR2_Idx12 | Primer – Reverse       | CTTGTA | CAAGCAGAAGACGGCATAACGAGATTACAAGGTGACTGGAGTTCA<br>GACGTGTGC |
